# Supplementary material for: ABO Blood Group, SARS-CoV-2 Infection, and Risk of Venous Thromboembolism: Population-Based Cohort Study
Source: PubMed Central journal article supplement (PMC8040562; doi:10.1177/10760296211008986), 2021-04-08
Supplement: sj-pdf-1-cat-10.1177_10760296211008986.pdf [file sj-pdf-1-cat-10.1177_10760296211008986.pdf]

**Table S1. Variables used to define cohort entry and exclusion criteria, as well as study exposures, outcomes and adjustment.**

| <b>Assessment</b>         | <b>Timing</b>                                              | <b>Disease, procedure or condition</b>                                                             | <b>CIHI-DAD, SDS or NACRS ICD-10-CA diagnosis or CCI procedure codes</b>           | <b>OHIP ICD-9 diagnosis or fee codes; or other data source</b>                                                                                                                                                                                                                                                                                                                                                               | <b>Validation studies or documentation for some codes</b>                                                                                                                                                                                                  |
|---------------------------|------------------------------------------------------------|----------------------------------------------------------------------------------------------------|------------------------------------------------------------------------------------|------------------------------------------------------------------------------------------------------------------------------------------------------------------------------------------------------------------------------------------------------------------------------------------------------------------------------------------------------------------------------------------------------------------------------|------------------------------------------------------------------------------------------------------------------------------------------------------------------------------------------------------------------------------------------------------------|
| <i>Inclusion criteria</i> | ABO-Rh specimen date January 2007 to December 2019         | Individuals with an ABO-Rh blood group test result in Ontario, Canada                              | --                                                                                 | LOINC codes 882-1, 883-9, 10331-7 in the Ontario Laboratory Information System ( <a href="#">OLIS</a> ) - includes most outpatient laboratory information in Ontario                                                                                                                                                                                                                                                         | --                                                                                                                                                                                                                                                         |
| <i>Exclusion criteria</i> | SARS-CoV-2 specimen date January 15, 2020 to June 30, 2020 | Individuals without a SARS-CoV-2 RNA PCR positive or negative laboratory result in Ontario, Canada | --                                                                                 | Test Request (TR)/LOINC codes for SARS-CoV-2 and other respiratory virus testing: TR12936-1, TR12937-9, 94315-9, 94314-2, 94316-7, XON13512-9, XON13529-3, XON13528-5, XON13531-9, XON13527-7. These codes, plus keywords such as "COVID", "SARS-CoV-2", "Novel coronavirus" or "nCOV" or microorganism SNOMED codes (840533007 [SARS-CoV-2], 168209000 [No Virus Identified]), were used to define the data pull from OLIS. | For the ICES methodology and Python script for cleaning and parsing OLIS lab results for SARS-CoV-2 and other respiratory viruses, see <a href="https://github.com/icescentral/COVID19-Lab-Results">https://github.com/icescentral/COVID19-Lab-Results</a> |
|                           | SARS-CoV-2 specimen date                                   | Sex or birth date is missing or inconsistent in OLIS and RPDB                                      | --                                                                                 | OLIS, and Registered Persons Database ( <a href="#">RPDB</a> ) - contains demographic information and encrypted healthcare numbers for all OHIP eligible individuals                                                                                                                                                                                                                                                         | --                                                                                                                                                                                                                                                         |
|                           | Same as above                                              | Death occurred > 1 day before the specimen date                                                    | Discharge disposition is not alive ( <a href="#">DAD</a> , <a href="#">NACRS</a> ) | RPDB                                                                                                                                                                                                                                                                                                                                                                                                                         | --                                                                                                                                                                                                                                                         |
|                           | Same as above                                              | Non-Ontario resident                                                                               | --                                                                                 | OLIS, RPDB                                                                                                                                                                                                                                                                                                                                                                                                                   | --                                                                                                                                                                                                                                                         |
| <i>Study exposures</i>    | January 2007 to December 2019                              | ABO blood group                                                                                    | --                                                                                 | LOINC codes 882-1, 883-9, 10331-7 in OLIS                                                                                                                                                                                                                                                                                                                                                                                    | --                                                                                                                                                                                                                                                         |

|                                                                         |                                                                                                                                                                                                        |                                                                                                                                  |                                                                                                                                                                                                                                                                                                                                                                                                                                                         |                                                                                                                                                                                                                                                                                                                                                |    |
|-------------------------------------------------------------------------|--------------------------------------------------------------------------------------------------------------------------------------------------------------------------------------------------------|----------------------------------------------------------------------------------------------------------------------------------|---------------------------------------------------------------------------------------------------------------------------------------------------------------------------------------------------------------------------------------------------------------------------------------------------------------------------------------------------------------------------------------------------------------------------------------------------------|------------------------------------------------------------------------------------------------------------------------------------------------------------------------------------------------------------------------------------------------------------------------------------------------------------------------------------------------|----|
|                                                                         | SARS-CoV-2 specimen date January 15, 2020 to June 30, 2020                                                                                                                                             | SARS-CoV-2 positive test (if > 1 test per person, the first positive test was used; otherwise the first negative test was used). | --                                                                                                                                                                                                                                                                                                                                                                                                                                                      | OLIS                                                                                                                                                                                                                                                                                                                                           | -- |
| <i>Main study outcome of pulmonary embolism or deep vein thrombosis</i> | ABO specimen date (the first time zero used in the study) to July 31, 2020.<br><br>or<br><br>SARS-CoV-2 specimen date (the second time zero used in the study) to July 31, 2020.<br>Censored at death. | Pulmonary embolism                                                                                                               | ICD-10-CA (DAD, SDS, NACRS): I260, I269, O88201, O88202, O88203, O88204, O88209<br><br><u>AND</u><br><br>one of the following CCI codes for diagnostic imaging during the same admission:<br>3KX30DA, 3KX30DB, 3KX30DC, 3KX30DD, 3KR10VC, 3KR10VN, 3KR12VA, 3KX10VA, 3KX10VC, 3KX10VN, 3KX10VX, 3KX12VA, 3IM10VC, 3IM10VX, 3IM10VY, 3IM12VA, 3GT70CA, 3GT70CC, 3GT70CE, 3GT70KC, 3GT70KD, 3GT70KE, 3JY10VA, 3JY10VC, 3JY10VN, 3JY10VX, 3JY12VA, 3JY20WC | OHIP ICD-9: 677, 415<br><br><u>AND</u><br><br>one of the following OHIP radiological professional fee codes for a VTE diagnostic test billed within 3 days: J198, J498, J193, J493, J202, J502, J206, J506, J182, J482, X406, X407, X125, X188, X401, X405, X408, X126, X410, X231, X232, X233, X127, X413, X421, X425, J659, J660, J859, J860 | -- |

|                   |                                                                                                                                                            |                      |                                                                                                                                                                                                                                                                                                                                                                                                                                                                                                                                                  |                                                                                                                                                                                                                                                                                                                                                |    |
|-------------------|------------------------------------------------------------------------------------------------------------------------------------------------------------|----------------------|--------------------------------------------------------------------------------------------------------------------------------------------------------------------------------------------------------------------------------------------------------------------------------------------------------------------------------------------------------------------------------------------------------------------------------------------------------------------------------------------------------------------------------------------------|------------------------------------------------------------------------------------------------------------------------------------------------------------------------------------------------------------------------------------------------------------------------------------------------------------------------------------------------|----|
|                   | Same as above                                                                                                                                              | Deep vein thrombosis | ICD-10-CA (DAD, SDS, NACRS): I636, I822, I828, I829, I801, I802, I803, I808, I809, O22301, O22303, O22309, O22501, O22503, O22509, O87102, O871.04, O87109, O87304, O87309<br><br><u>AND</u><br><br>one of the following CCI codes for diagnostic imaging during the same admission: 3KX30DA, 3KX30DB, 3KX30DC, 3KX30DD, 3KR10VC, 3KR10VN, 3KR12VA, 3KX10VA, 3KX10VC, 3KX10VN, 3KX10VX, 3KX12VA, 3IM10VC, 3IM10VX, 3IM10VY, 3IM12VA, 3GT70CA, 3GT70CC, 3GT70CE, 3GT70KC, 3GT70KD, 3GT70KE, 3JY10VA, 3JY10VC, 3JY10VN, 3JY10VX, 3JY12VA , 3JY20WC | OHIP ICD-9: 671, 451<br><br><u>AND</u><br><br>one of the following OHIP radiological professional fee codes for a VTE diagnostic test billed within 3 days: J198, J498, J193, J493, J202, J502, J206, J506, J182, J482, X406, X407, X125, X188, X401, X405, X408, X126, X410, X231, X232, X233, X127, X413, X421, X425, J659, J660, J859, J860 | -- |
| <i>Covariates</i> | ABO specimen date onward (the first time zero used in the study)<br><br>or<br><br>SARS-CoV-2 specimen date onward (the second time zero used in the study) | Age                  | --                                                                                                                                                                                                                                                                                                                                                                                                                                                                                                                                               | RPDB                                                                                                                                                                                                                                                                                                                                           | -- |
|                   | Same as above                                                                                                                                              | Sex                  | --                                                                                                                                                                                                                                                                                                                                                                                                                                                                                                                                               | RPDB                                                                                                                                                                                                                                                                                                                                           | -- |

|  |                                                                                                                                                                                                         |                                                                                             |                                                                                                                                                                                                                                                                                                                                                                                                                                                                                                                                                                                                                                                          |                                                                                                                                                                                                                                                                                                                                                                      |                                                                                                          |
|--|---------------------------------------------------------------------------------------------------------------------------------------------------------------------------------------------------------|---------------------------------------------------------------------------------------------|----------------------------------------------------------------------------------------------------------------------------------------------------------------------------------------------------------------------------------------------------------------------------------------------------------------------------------------------------------------------------------------------------------------------------------------------------------------------------------------------------------------------------------------------------------------------------------------------------------------------------------------------------------|----------------------------------------------------------------------------------------------------------------------------------------------------------------------------------------------------------------------------------------------------------------------------------------------------------------------------------------------------------------------|----------------------------------------------------------------------------------------------------------|
|  | <p>Within 5 years before the ABO specimen date (the first time zero used in the study)</p> <p>or</p> <p>Within 5 years before the SARS-CoV-2 specimen date (the second time zero used in the study)</p> | <p>History of pulmonary embolism, deep vein thrombosis, or other venous thromboembolism</p> | <p>ICD-10-CA (DAD, SDS, NACRS): I260, I269, O88201, O88202, O88203, O88204, O88209, I636, I822, I828, I829, I801, I802, I803, I808, I809, O22301, O22303, O22309, O22501, O22503, O22509, O87102, O87104, O87109, O87304, O87309, I676, I81, I820, I823, O228, O229, O878, O879</p> <p><u>AND</u></p> <p>one of the following CCI codes for diagnostic imaging during the same admission: 3KX30DA, 3KX30DB, 3KX30DC, 3KX30DD, 3KR10VC, 3KR10VN, 3KR12VA, 3KX10VA, 3KX10VC, 3KX10VN, 3KX10VX, 3KX12VA, 3IM10VC, 3IM10VX, 3IM10VY, 3IM12VA, 3GT70CA, 3GT70CC, 3GT70CE, 3GT70KC, 3GT70KD, 3GT70KE, 3JY10VA, 3JY10VC, 3JY10VN, 3JY10VX, 3JY12VA, 3JY20WC</p> | <p>OHIP ICD-9: 677, 415, 671, 451, 452</p> <p><u>AND</u></p> <p>one of the following OHIP radiological professional fee codes for a VTE diagnostic test billed within 3 days: J198, J498, J193, J493, J202, J502, J206, J506, J182, J482, X406, X407, X125, X188, X401, X405, X408, X126, X410, X231, X232, X233, X127, X413, X421, X425, J659, J660, J859, J860</p> | <p>--</p>                                                                                                |
|  | <p>Same as above</p>                                                                                                                                                                                    | <p>History of malignancy</p>                                                                | <p>ICD-10-CA (DAD, SDS, NACRS): C00-C97</p>                                                                                                                                                                                                                                                                                                                                                                                                                                                                                                                                                                                                              | <p>--</p>                                                                                                                                                                                                                                                                                                                                                            | <p>--</p>                                                                                                |
|  | <p>Same as above</p>                                                                                                                                                                                    | <p>Chronic kidney disease (CKD)</p>                                                         | <p><u>CKD diagnosis</u><br/>ICD-10-CA (DAD, NACRS): E102, E112, E132, E142, I12, I13, N08, N18, N19</p>                                                                                                                                                                                                                                                                                                                                                                                                                                                                                                                                                  | <p><u>CKD diagnosis</u><br/>ICD-9 (OHIP): 403, 585</p>                                                                                                                                                                                                                                                                                                               | <p><a href="https://pubmed.ncbi.nlm.nih.gov/23560464/">https://pubmed.ncbi.nlm.nih.gov/23560464/</a></p> |

|  |  |  |                                                                                                                                                                           |                                                                                                                                                                                                                                                                                                                                                                                                                                                                            |                                                                                                          |
|--|--|--|---------------------------------------------------------------------------------------------------------------------------------------------------------------------------|----------------------------------------------------------------------------------------------------------------------------------------------------------------------------------------------------------------------------------------------------------------------------------------------------------------------------------------------------------------------------------------------------------------------------------------------------------------------------|----------------------------------------------------------------------------------------------------------|
|  |  |  | <p><u>Chronic dialysis</u><br/>At least 2 of the following CCI (DAD, SDS) codes separated by 90 days, but &lt; 150 days, in the year before the index date:<br/>1PZ21</p> | <p><u>Chronic dialysis</u><br/>At least 2 of the following OHIP fee codes separated by 90 days, but &lt; 150 days, in the year before the index date: R849, G082, G083, G085, G090-G096, G294, G295, G323, G325, G326, G330-G333, G860-G866, H540, H740</p> <p>Treatment codes (<u>CORR</u>): 060, 111, 112, 113, 121, 122, 123, 131, 132, 133, 141, 151, 152, 211, 221, 231, 241, 242, 251, 252, 311, 312, 313, 321, 322, 323, 331, 332, 333, 413, 423, 433, 443, 453</p> | <p><a href="https://pubmed.ncbi.nlm.nih.gov/20613656/">https://pubmed.ncbi.nlm.nih.gov/20613656/</a></p> |
|  |  |  | <p><u>Exclude kidney transplant</u><br/>CCI (DAD): 1PC85</p>                                                                                                              | <p><u>Exclude kidney transplant</u><br/>OHIP fee codes: S435, S434</p> <p>CORR treatment code: 171 plus ≥ 1 Transplanted Organ Code [1-3]: 10, 11, 12, 18, 19</p>                                                                                                                                                                                                                                                                                                          | <p><a href="https://pubmed.ncbi.nlm.nih.gov/26019887/">https://pubmed.ncbi.nlm.nih.gov/26019887/</a></p> |

|  |               |                             |                                                                                                                                                                                                                                                                                                                                                                                                                                                                              |    |                                                                                                   |
|--|---------------|-----------------------------|------------------------------------------------------------------------------------------------------------------------------------------------------------------------------------------------------------------------------------------------------------------------------------------------------------------------------------------------------------------------------------------------------------------------------------------------------------------------------|----|---------------------------------------------------------------------------------------------------|
|  | Same as above | History of cardiac ischemia | <p>At least 1 hospitalization (DAD) or ED (NACRS) visit with a diagnosis or procedure coded with 1 of the following codes:</p> <p><u>Angina:</u><br/>ICD-10-CA: I20, I2382, I24</p> <p><u>Chronic Ischemic Heart Disease:</u><br/>ICD-10-CA: I25</p> <p><u>Myocardial infarction:</u><br/>ICD-10-CA: I21, I22</p> <p><u>Coronary Artery Bypass Grafting:</u><br/>CCI: 1IJ76, 1IJ80</p> <p><u>Percutaneous Coronary Intervention:</u><br/>CCI: 1IJ26, 1IJ50, 1IJ55, 1IJ57</p> | -- | <a href="https://pubmed.ncbi.nlm.nih.gov/20847972/">https://pubmed.ncbi.nlm.nih.gov/20847972/</a> |
|--|---------------|-----------------------------|------------------------------------------------------------------------------------------------------------------------------------------------------------------------------------------------------------------------------------------------------------------------------------------------------------------------------------------------------------------------------------------------------------------------------------------------------------------------------|----|---------------------------------------------------------------------------------------------------|

|  |                                                                                                                                                                                             |                               |                                                                                                                                                                                                                                                                                                                                                                                                                                                                                                                           |                 |                                                                                                                                                                                                                                                                                                                                                                                                                                                      |
|--|---------------------------------------------------------------------------------------------------------------------------------------------------------------------------------------------|-------------------------------|---------------------------------------------------------------------------------------------------------------------------------------------------------------------------------------------------------------------------------------------------------------------------------------------------------------------------------------------------------------------------------------------------------------------------------------------------------------------------------------------------------------------------|-----------------|------------------------------------------------------------------------------------------------------------------------------------------------------------------------------------------------------------------------------------------------------------------------------------------------------------------------------------------------------------------------------------------------------------------------------------------------------|
|  | Same as above                                                                                                                                                                               | History of cardiac arrhythmia | <p>At least 1 hospitalization (DAD) or ED (NACRS) visit with a diagnosis or procedure coded with 1 of the following codes:</p> <p><u>Atrial Fibrillation/Atrial Flutter:</u><br/>ICD-10-CA: I48</p> <p><u>Ventricular Arrhythmia &amp; Tachycardia:</u><br/>ICD-10-CA: I470, I472, I490, I493</p> <p><u>Permanent Pacemaker:</u><br/>CCI: 1HZ53GRNM, 1HZ53LANM, 1HZ53GRNK, 1HZ53LANK, 1HZ53GRNL, 1HZ53LANL</p> <p><u>Implantable Cardioverter- Defibrillator:</u><br/>CCI: 1HZ53GRFS, 1HZ53LAFS, 1HZ53SYFS, 1HZ53HAFS</p> | --              | <p><a href="https://pubmed.ncbi.nlm.nih.gov/19433698/">https://pubmed.ncbi.nlm.nih.gov/19433698/</a></p> <p><a href="https://www.ices.on.ca/Publications/Atlases-and-Reports/2006/Canadian-Institute-for-Health-Information">https://www.ices.on.ca/Publications/Atlases-and-Reports/2006/Canadian-Institute-for-Health-Information</a></p> <p><a href="https://pubmed.ncbi.nlm.nih.gov/17599603/">https://pubmed.ncbi.nlm.nih.gov/17599603/</a></p> |
|  | <p>Any time before the ABO specimen date (the first time zero used in the study)</p> <p>or</p> <p>Any time before the SARS-CoV-2 specimen date (the second time zero used in the study)</p> | History of heart failure      | <p>The ICES-derived <a href="#">CHF</a> database was used to identify patients with CHF, based on 1 ED, hospitalization or outpatient claim, and a second claim in 1 year. <i>The CHF database is limited to those 40 years of age or older.</i></p> <p>ICD-10-CA (DAD, SDS): I500, I501, I509</p>                                                                                                                                                                                                                        | OHIP ICD-9: 428 | <p><a href="https://pubmed.ncbi.nlm.nih.gov/23735455/">https://pubmed.ncbi.nlm.nih.gov/23735455/</a></p>                                                                                                                                                                                                                                                                                                                                             |

|                                 |                                              |                                              |                                                                                                                                                                                                                                                                                                                                                     |                                                                 |                                                                                                                                                                     |
|---------------------------------|----------------------------------------------|----------------------------------------------|-----------------------------------------------------------------------------------------------------------------------------------------------------------------------------------------------------------------------------------------------------------------------------------------------------------------------------------------------------|-----------------------------------------------------------------|---------------------------------------------------------------------------------------------------------------------------------------------------------------------|
|                                 | Same as above                                | Diabetes mellitus                            | The ICES-derived <a href="#">ODD</a> database was used to identify patients with diagnosed diabetes before the index date, based on 2 OHIP diagnostic codes or 1 OHIP fee code or 1 DAD/SDS diagnostic code, within 2 years.<br><br>ICD-10-CA: E10, E11, E13, E14                                                                                   | OHIP ICD-9: 250<br>OHIP fee codes: Q040, K029, K030, K045, K046 | <a href="https://pubmed.ncbi.nlm.nih.gov/11874939/">https://pubmed.ncbi.nlm.nih.gov/11874939/</a>                                                                   |
| <i>Other baseline variables</i> | SARS-CoV-2 specimen date                     | Area income quintile                         | --                                                                                                                                                                                                                                                                                                                                                  | Statistics Canada <a href="#">Census</a>                        | --                                                                                                                                                                  |
|                                 | Any time before the SARS-CoV-2 specimen date | Asthma                                       | The ICES-derived <a href="#">ASTHMA</a> database was used to identify patients with diagnosed asthma before the index date, based on 2 OHIP diagnostic codes or 1 DAD diagnostic code.<br><br>ICD-10-CA: J45, J46                                                                                                                                   | OHIP ICD-9: 493                                                 | <a href="https://pubmed.ncbi.nlm.nih.gov/20011725/">https://pubmed.ncbi.nlm.nih.gov/20011725/</a>                                                                   |
|                                 | Same as above                                | Chronic obstructive pulmonary disease (COPD) | The ICES-derived <a href="#">COPD</a> database was used to identify patients with diagnosed COPD before the index date, based on 1 OHIP diagnostic code or 1 DAD diagnostic code.<br><br>ICD-10-CA: J41-J44                                                                                                                                         | OHIP ICD-9: 491, 492, 496                                       | <a href="https://pubmed.ncbi.nlm.nih.gov/19863368/">https://pubmed.ncbi.nlm.nih.gov/19863368/</a> <i>The COPD algorithm was validated in those aged ≥ 35 years.</i> |
|                                 | Same as above                                | Chronic hypertension                         | The ICES-derived <a href="#">HYPER</a> database was used to identify patients with:<br>a) 1 hospital admission with a hypertension diagnosis, or<br>b) an OHIP claim with a hypertension diagnosis followed within 2 years by either an OHIP claim or a hospital admission with a hypertension diagnosis.<br><br>ICD-10-CA (DAD, SDS): I10-I13, I15 | OHIP ICD-9: 401-405                                             | <a href="https://pubmed.ncbi.nlm.nih.gov/20101286/">https://pubmed.ncbi.nlm.nih.gov/20101286/</a>                                                                   |



|  |                                                   |                                             |                                                                                                                                                                                                                                                                                                                                                                                                                                                                                                                                                                                                                                                           |                                                                                                                                                                                                                                                                                                                                      |                                                                                                   |
|--|---------------------------------------------------|---------------------------------------------|-----------------------------------------------------------------------------------------------------------------------------------------------------------------------------------------------------------------------------------------------------------------------------------------------------------------------------------------------------------------------------------------------------------------------------------------------------------------------------------------------------------------------------------------------------------------------------------------------------------------------------------------------------------|--------------------------------------------------------------------------------------------------------------------------------------------------------------------------------------------------------------------------------------------------------------------------------------------------------------------------------------|---------------------------------------------------------------------------------------------------|
|  | Same as above                                     | Immunocompromised (HIV or organ transplant) | --                                                                                                                                                                                                                                                                                                                                                                                                                                                                                                                                                                                                                                                        | <p>The ICES-derived <a href="#">HIV</a> database was used to identify patients with pre-existing HIV, based on 3 physician claims in 3 years.</p> <p>OHIP ICD-9: 042-044</p> <p><a href="#">CORRLINK</a> links CORR and DAD data and includes patients who received an organ transplant, and does not include dialysis patients.</p> | <a href="https://pubmed.ncbi.nlm.nih.gov/21738786/">https://pubmed.ncbi.nlm.nih.gov/21738786/</a> |
|  | Same as above                                     | Dementia                                    | <p>The ICES-derived <a href="#">DEMENTIA</a> database was used to identify individuals with 1 hospitalization for dementia and/or 3 outpatient visits for dementia, each separated by 30 days, within 2 years, or 1 prescription from ODB.</p> <p>ICD-10-CA (DAD, SDS): F00-F03, G30</p>                                                                                                                                                                                                                                                                                                                                                                  | <p>OHIP ICD-9: 290, 331</p> <p><a href="#">ODB</a><br/>1 prescription for a cholinesterase inhibitor</p>                                                                                                                                                                                                                             | <a href="https://pubmed.ncbi.nlm.nih.gov/27567819/">https://pubmed.ncbi.nlm.nih.gov/27567819/</a> |
|  | Within 1 year before the SARS-CoV-2 specimen date | Frailty                                     | <p>Identified based on the following rules, using DAD and OHIP databases:</p> <ol style="list-style-type: none"> <li>1. Long-term care residence (i.e., admitted from/discharged to, a nursing home after hospital stay, or location of physician billing claim was long-term care facility);</li> <li>2. Receipt of palliative care;</li> <li>3. Two or more domains derived from frailty scales (i.e., cognitive impairment, falls, general health status, incontinence, nutrition issues, functional performance) and health services utilization (i.e., <math>\geq 2</math> hospital stays or ED visits, geriatrician or home care visit).</li> </ol> | --                                                                                                                                                                                                                                                                                                                                   | <a href="https://pubmed.ncbi.nlm.nih.gov/28974280/">https://pubmed.ncbi.nlm.nih.gov/28974280/</a> |

|  |                                                    |                                                    |                                                                                                                                                                                                                                                                                                                                                                      |                          |                                                                                                                                                                                     |
|--|----------------------------------------------------|----------------------------------------------------|----------------------------------------------------------------------------------------------------------------------------------------------------------------------------------------------------------------------------------------------------------------------------------------------------------------------------------------------------------------------|--------------------------|-------------------------------------------------------------------------------------------------------------------------------------------------------------------------------------|
|  | Within 5 years before the SARS-CoV-2 specimen date | Anemia                                             | ICD-10-CA (DAD, SDS, NACRS): D50-D53, D55, D56, D572-D574, D58-D61, D63, P55, P560, P570                                                                                                                                                                                                                                                                             | OHIP ICD-9: 280-285, 773 | --                                                                                                                                                                                  |
|  | Same as above                                      | Transient ischemic attack or acute ischemic stroke | <p><u>Transient Ischemic Attack:</u><br/>At least 1 hospitalization or ED visit with 1 of the following diagnosis codes:</p> <p>ICD-10-CA (DAD, NACRS): G450-G453, G458, G459, H340</p> <p><u>Acute Ischemic Stroke:</u><br/>1 hospitalization with a main diagnosis coded with one of the following codes:</p> <p>ICD-10-CA (DAD): I63 (except I636), I64, H341</p> | --                       | <a href="http://canadians.trokenetwork.ca/en/wp-content/uploads/2014/08/Stroke_Core_ENG.pdf">http://canadians.trokenetwork.ca/en/wp-content/uploads/2014/08/Stroke_Core_ENG.pdf</a> |

ASTHMA: Ontario Asthma dataset; CCI: Canadian Classification of Interventions; CHF: Ontario Congestive Heart Failure dataset; CIHI: Canadian Institute for Health Information; CORR: Canadian Organ Replacement Registry; DAD: Discharge Abstract Database; DEMENTIA: Ontario Dementia dataset; ED: Emergency Department; HIV: Ontario HIV dataset; HYPER: Ontario Hypertension dataset; ICD-9: International Classification of Diseases, 9th Revision; ICD-10-CA: International Classification of Diseases, 10th Revision, Canada; ICU: Intensive Care Unit; LHIN: Local Health Integration Network; LOINC: Logical Observation Identifiers Names and Codes; NACRS: National Ambulatory Care Reporting System; ODB: Ontario Drug Benefit; ODD: Ontario Diabetes Dataset; OHIP: Ontario Health Insurance Plan; OLIS: Ontario Laboratories Information System; RPDB: Registered Persons Database; SDS: Same Day Surgery
